# Supplementary material for: Study on Consumer Knowledge, Attitude and Purchasing Practices Regarding Edible Fats and Oil in Kandy
Source: Preprints.org preprint supplement (doi:10.20944/preprints202308.1437.v1), 2023-08-21
Supplement: Supplementary file 1 [file supplementary]

**Study on Consumer Knowledge, Attitude and Purchasing Practices Regarding Edible Fats and Oil in Kandy**

**WMNL Weerasooriya1***

0009-0003-1735-5158

Department of Food Science and Technology

Postgraduate Institute of Agriculture

University of Peradeniya

E mail: nisansala.weerasooriya@yahoo.com

**E Mendis1**

Department of Food Science and Technology

Postgraduate Institute of Agriculture

University of Peradeniya

E mail : ereshamendis@yahoo.com
